# Supplementary material for: Identification, Verification and Pathway Enrichment Analysis of Prognosis-Related Immune Genes in Patients With Hepatocellular Carcinoma
Source: Front Oncol. 2021 Sep 20;11:695001. doi: 10.3389/fonc.2021.695001 (PMC8488301; doi:10.3389/fonc.2021.695001)
Supplement: Supplementary Data Sheet 2 — —Risk value file for patients in the TCGA-LIHC cohort. [file DataSheet_2.xlsx]

## Sheet: Sheet1
id	futime	fustat	HDAC1	BIRC5	SPP1	STC2	NR6A1	riskScore	risk
TCGA-CC-A7IE	0.594521	1	4.76519	2.97248	7.47032	2.2221	2.61997	4.08295	high
TCGA-ED-A7PX	0.0164384	0	5.35024	2.54555	7.92315	2.81171	0.236085	2.08907	high
TCGA-2Y-A9HA	0.0986301	1	4.35883	2.13578	9.43186	2.13704	0.856158	1.81971	high
TCGA-CC-A5UE	0.745205	1	5.75928	4.64448	9.02698	0.455087	0.652228	2.30139	high
TCGA-ED-A97K	0.0164384	0	5.18031	1.67644	8.33079	0.568662	1.29552	1.60982	high
TCGA-DD-AACI	4.43288	0	4.2118	1.28297	6.8693	0.637615	0.224826	0.669161	low
TCGA-DD-A4NG	2.19726	1	3.81124	1.13384	6.34078	0.597049	0.693476	0.667136	low
TCGA-DD-A3A2	5.83836	1	3.73402	0.231323	0.565819	0.0942026	0.561333	0.297451	low
TCGA-DD-A73F	2.9726	0	4.27778	2.8913	2.84364	0.667056	0.506274	0.690454	low
TCGA-CC-A3MB	0.863014	1	4.63905	3.33002	2.88105	0.539483	0.747381	0.87525	low
TCGA-MI-A75H	2.04658	0	4.25494	1.22268	7.5799	0.545264	0.615196	0.816207	low
TCGA-DD-A4NK	3.31507	1	3.80517	0.497703	0.960671	0.574149	0.716556	0.390417	low
TCGA-DD-AACO	5.13973	0	3.72209	3.30089	5.31009	0.581051	0.587488	0.771967	low
TCGA-2Y-A9H0	10.0685	0	4.08838	4.06092	6.58298	0.670857	0.632991	1.10761	high
TCGA-CC-A5UD	0.832877	1	4.87289	4.41384	6.80696	1.09476	1.17872	2.06657	high
TCGA-LG-A9QD	1.00274	0	3.74049	0.187593	2.8924	0.00984207	0.417051	0.332199	low
TCGA-DD-A3A1	0.638356	1	3.40511	2.28081	10.8874	0.575093	0.431601	0.909114	low
TCGA-NI-A8LF	1.66027	0	3.78435	1.05761	5.38827	1.32056	0.811351	0.757817	low
TCGA-BC-A110	5.79726	1	3.81106	0.193355	3.7556	1.04533	0.196682	0.430267	low
TCGA-CC-A9FU	0.00273973	0	4.97975	3.7106	5.19227	1.08083	1.35688	1.8085	high
TCGA-XR-A8TG	2.46027	0	4.92241	2.71869	6.2103	0.832967	0.844387	1.28751	high
TCGA-KR-A7K8	2.48219	0	3.93154	2.38085	3.94162	0.415765	0.65853	0.635991	low
TCGA-DD-AACB	6.36712	0	5.23661	2.8609	8.60289	1.07309	0.68494	1.74861	high
TCGA-DD-AACW	3.90137	0	4.46314	2.74441	0.685114	0.248432	0.732212	0.589858	low
TCGA-DD-A119	0.610959	1	3.99622	1.52565	9.07227	1.03422	0.466257	0.94906	high
TCGA-O8-A75V	1.47397	0	4.36126	1.80984	9.90188	0.709911	0.524878	1.11415	high
TCGA-G3-AAV6	0.178082	1	4.59111	4.40691	4.47724	1.14578	2.26518	2.45995	high
TCGA-DD-A4NH	1.89041	0	4.36005	3.32205	8.02461	3.64291	1.2586	3.25894	high
TCGA-YA-A8S7	1.12877	1	5.30806	3.22604	11.6033	2.2796	0.601654	3.13877	high
TCGA-4R-AA8I	0.717808	1	4.13129	1.45307	5.51354	0.622467	0.832122	0.761532	low
TCGA-CC-A9FS	0.578082	0	3.82924	1.72513	3.54233	2.7283	0.878885	1.05035	high
TCGA-ZP-A9D4	1.08219	0	4.2841	1.39512	3.55979	0.752468	1.04472	0.755399	low
TCGA-MI-A75G	1.91233	0	3.99347	0.839194	2.85809	0.529524	0.609161	0.480214	low
TCGA-DD-AADP	1.25479	0	3.9767	1.90868	5.64491	0.686943	0.707379	0.757724	low
TCGA-CC-A7IJ	1.04658	0	5.60906	5.85155	6.93673	1.87405	0.606012	3.04929	high
TCGA-NI-A4U2	4.90685	1	3.74126	0.916408	3.1217	0.479204	0.326897	0.406021	low
TCGA-DD-A115	6.96438	1	3.8014	2.8851	2.4426	0.396674	0.780478	0.606464	low
TCGA-ED-A5KG	1.32055	0	5.41188	2.4068	7.70144	0.927214	0.427837	1.39303	high
TCGA-RC-A7S9	1.75342	0	5.32807	2.59471	1.7663	0.408246	0.860338	0.892541	low
TCGA-DD-AADM	0.0328767	1	4.53778	2.36683	10.0725	0.349678	0.546479	1.18857	high
TCGA-DD-A11C	1.8137	0	4.68191	2.86994	5.08258	1.7104	0.54927	1.22818	high
TCGA-DD-A1EI	0.50137	0	4.44699	2.325	4.4996	1.25956	0.786878	0.996692	high
TCGA-2Y-A9H9	1.90959	0	4.32031	2.18091	1.45091	0.706148	0.591951	0.588841	low
TCGA-DD-AAW2	5.08219	0	4.25049	0.897266	0.860519	0.377158	0.803742	0.460711	low
TCGA-DD-AAE2	1.74795	0	3.95083	1.9896	3.32272	0.778565	0.595936	0.612812	low
TCGA-DD-A4NE	1.80822	1	4.48684	3.30834	1.86905	0.856297	0.569282	0.7714	low
TCGA-DD-AADI	2.9726	0	4.86853	1.46375	2.25424	0.50889	0.686836	0.661944	low
TCGA-K7-A5RG	1.42192	0	4.95633	2.3685	5.40423	0.674104	1.52764	1.46766	high
TCGA-DD-AAD1	1.54521	0	4.56187	1.25574	4.95835	1.06864	0.817711	0.890321	low
TCGA-WJ-A86L	0.945205	0	3.83093	2.65371	4.06037	1.30072	1.03101	0.936358	high
TCGA-UB-AA0V	0.860274	0	4.04537	0.277386	4.9239	0.184704	0.510575	0.472465	low
TCGA-CC-A7IG	0.819178	1	5.05197	4.64293	6.06976	2.79134	0.697032	2.6411	high
TCGA-UB-A7MD	0.142466	1	4.2587	1.845	10.59	1.50801	0.671302	1.48518	high
TCGA-DD-AAW1	5.44932	0	3.7746	0.361199	3.68409	0.606385	0.767958	0.490118	low
TCGA-CC-A7IK	0.717808	1	5.07209	3.09966	9.3242	0.41751	1.33713	2.02787	high
TCGA-DD-AAE1	1.51233	0	4.28283	1.3484	2.05716	0.345374	0.576356	0.495526	low
TCGA-DD-A39W	2.26575	1	4.98568	0.636999	3.45721	0.201459	1.27475	0.79303	low
TCGA-2Y-A9H5	1.52055	1	4.23962	1.44547	4.70531	1.35183	1.21549	1.02559	high
TCGA-EP-A26S	0.649315	0	4.6265	0.622516	3.78981	0.691265	0.665869	0.645487	low
TCGA-DD-AAVY	5.39726	0	4.20142	0.257438	8.07266	1.06106	0.915904	0.936923	high
TCGA-BC-A10X	2.10959	1	4.15056	0.313533	4.72443	0.900832	0.292145	0.525779	low
TCGA-BC-4073	0.964384	0	4.70328	2.70651	7.31053	1.87556	0.593848	1.54195	high
TCGA-ED-A8O5	1.11233	0	4.3771	1.75325	0.870222	0.872673	1.41861	0.781853	low
TCGA-UB-A7ME	1.33151	0	4.93243	2.00778	3.01049	0.739416	0.51969	0.766998	low
TCGA-DD-AADO	1.2411	0	4.06921	2.98234	5.8107	0.284767	0.619651	0.802745	low
TCGA-2Y-A9H7	3.2	0	3.76438	2.33035	5.39312	0.323804	0.554394	0.63599	low
TCGA-ZS-A9CF	6.60822	0	4.83048	3.21444	5.34002	1.5844	1.28029	1.793	high
TCGA-DD-AAD2	1.80274	0	4.38299	2.00986	9.11604	0.650172	0.598259	1.09653	high
TCGA-DD-A4ND	6.11507	0	4.72806	1.87133	5.0814	1.28777	1.46988	1.41506	high
TCGA-DD-AAEI	4.19452	0	4.1737	2.5158	9.53712	0.572428	0.822706	1.23198	high
TCGA-G3-A7M7	0.989041	0	4.40824	0.6478	9.93822	0.578942	0.67211	0.988921	high
TCGA-DD-AAVS	4.99452	0	4.55989	2.24025	5.65668	0.497194	0.975139	1.00322	high
TCGA-G3-A5SL	1.70137	0	4.04511	1.44466	4.31404	1.51481	0.673794	0.78372	low
TCGA-G3-A25V	2.35616	0	4.29364	0.955108	10.931	1.02399	0.710509	1.22874	high
TCGA-BC-A216	3.70137	0	5.09355	3.80543	4.6533	0.578786	1.14913	1.47253	high
TCGA-G3-A25Z	1.79452	0	4.35129	1.72136	4.57351	0.363901	0.492428	0.638055	low
TCGA-FV-A4ZP	6.81096	1	4.11023	5.04802	7.44602	0.44763	0.366115	1.16948	high
TCGA-DD-A11A	0.216438	0	4.30517	2.13251	5.60603	0.355649	0.361773	0.688037	low
TCGA-DD-AADW	1.60822	0	4.63551	3.81993	6.75576	1.18988	1.39416	1.97168	high
TCGA-DD-AADB	3.40274	0	4.81728	3.16478	3.64328	0.657221	1.64345	1.42024	high
TCGA-CC-A7IH	1	0	4.25223	1.23076	0.501577	0.67728	0.787286	0.501377	low
TCGA-FV-A3I0	2.32329	0	4.6215	1.34164	13.0613	2.3841	0.0943581	1.85706	high
TCGA-G3-A7M5	1.22466	0	3.70591	0.747553	0.906428	1.57198	0.251728	0.413951	low
TCGA-DD-A1EB	5.52603	0	3.47205	0.925712	0.577521	0.380427	0.541882	0.323561	low
TCGA-XR-A8TE	2.53425	0	4.78812	0.367245	3.10267	1.4818	0.831116	0.800619	low
TCGA-DD-AAEB	1.30959	0	3.93289	0.787975	0.61282	0.502986	0.767615	0.41148	low
TCGA-G3-AAUZ	1.31507	0	3.95365	3.30025	2.5547	0.372993	0.679831	0.647789	low
TCGA-DD-AAVU	6.03288	0	3.70172	2.79077	8.85725	1.1073	0.58786	1.09242	high
TCGA-WX-AA47	1.52329	1	4.37888	1.08603	7.19931	1.11299	0.576353	0.910412	low
TCGA-2Y-A9GZ	2.32329	1	3.98977	2.03152	3.15569	0.519244	0.983879	0.67501	low
TCGA-2Y-A9GV	6.93699	1	4.16241	0.606551	2.41411	0.886219	0.591107	0.510028	low
TCGA-DD-AACP	1.13699	0	4.98423	3.83187	7.8386	0.618303	2.61701	3.41284	high
TCGA-XR-A8TD	2.82192	0	4.24486	3.41205	7.51139	2.03431	0.669946	1.62278	high
TCGA-BC-A8YO	1.53973	0	4.88306	3.32522	5.14363	0.561165	1.42319	1.49931	high
TCGA-MI-A75E	1.38904	0	4.3741	1.45657	8.1031	0.611857	0.426548	0.859366	low
TCGA-G3-A7M9	0.153425	1	6.22282	4.2537	7.77424	1.96353	2.96953	8.31819	high
TCGA-DD-A4NJ	2.08219	0	4.4048	3.05202	6.12856	0.918871	0.882539	1.19396	high
TCGA-RC-A6M5	0.0410959	0	5.59333	0.174159	6.12792	1.28928	0.420599	1.02599	high
TCGA-DD-A73E	0.120548	0	4.22092	1.26208	2.9291	0.636148	0.803367	0.608629	low
TCGA-DD-AADS	1.29863	0	3.33253	0.911542	1.17146	0.347002	0.353638	0.299322	low
TCGA-CC-A3M9	0.821918	1	5.65337	4.40253	7.78556	1.71555	0.439763	2.43179	high
TCGA-FV-A3I1	0.676712	1	4.85158	2.15553	9.70749	1.95686	0.788248	2.00858	high
TCGA-ED-A7XO	1.16986	0	4.78734	2.261	3.46921	0.5302	0.529967	0.754807	low
TCGA-K7-A5RF	1.72877	0	3.68541	0.220377	5.52319	0.256454	0.39405	0.430358	low
TCGA-MR-A520	0.627397	0	3.69856	0.473255	0.759564	0.414533	0.544309	0.332556	low
TCGA-CC-A7IF	1.77808	1	3.63005	3.25368	1.02955	0.546209	0.908301	0.589856	low
TCGA-DD-AAVW	6.34795	0	4.07625	1.49257	5.01335	1.08336	0.551948	0.722642	low
TCGA-DD-A39Y	0.468493	1	5.44936	4.297	9.82622	1.90834	0.652615	3.05672	high
TCGA-DD-A1EC	1.64932	0	4.66486	1.68707	2.89579	0.487275	0.463221	0.616732	low
TCGA-BW-A5NP	0.00273973	0	5.09673	2.4906	6.33021	0.954505	0.804696	1.34397	high
TCGA-DD-AADU	1.51781	0	3.2606	0.7316	7.71248	0.783494	0.67373	0.624376	low
TCGA-BC-A69H	1.21644	0	4.80024	4.31082	6.91884	2.34085	0.268677	1.89137	high
TCGA-DD-AADC	1.16438	1	5.50032	4.41554	8.7169	1.99832	1.56419	4.25237	high
TCGA-ED-A7PZ	0.0164384	0	5.08763	2.95746	7.15114	1.08183	0.375664	1.32938	high
TCGA-G3-A5SM	1.42466	0	4.02241	1.77979	6.88736	0.955322	0.583585	0.849776	low
TCGA-DD-A73D	1.89863	0	4.19982	1.81862	3.88143	0.433569	0.815459	0.67706	low
TCGA-ZS-A9CG	0.934247	0	3.94826	0.179706	6.11976	1.56387	0.685226	0.753547	low
TCGA-G3-A5SI	2.10411	1	4.67739	3.21292	2.94221	0.716092	0.667876	0.885026	low
TCGA-3K-AAZ8	1.08493	0	4.34266	0.48272	2.9593	0.389657	0.461477	0.464512	low
TCGA-G3-A3CI	0.493151	0	3.82227	0.397206	1.09746	0.431414	0.624584	0.364026	low
TCGA-DD-A4NV	5.52877	0	3.75126	0.452842	2.49485	0.64655	0.729451	0.444028	low
TCGA-ED-A66Y	0.810959	1	4.81961	2.47125	4.82865	0.556129	0.346699	0.821388	low
TCGA-BC-A10Q	3.10959	1	4.36078	2.8742	11.0056	1.86892	0.271822	1.70225	high
TCGA-DD-AAEA	1.57534	0	4.15489	2.80881	2.28795	0.272585	0.521067	0.573887	low
TCGA-DD-AAD0	0.375342	0	3.62428	2.26084	6.26745	0.34085	0.591462	0.662671	low
TCGA-DD-A3A9	2.55068	1	4.05921	2.09475	2.02292	0.845089	0.264154	0.512092	low
TCGA-5C-AAPD	0.0547945	0	5.78229	3.08811	5.30052	0.822717	0.660508	1.49864	high
TCGA-FV-A2QR	1.59178	1	4.21208	1.90968	5.8527	1.17259	0.613929	0.896421	low
TCGA-DD-A3A7	1.14795	1	4.35305	3.78052	6.46351	0.922239	0.659699	1.22522	high
TCGA-DD-A4NR	0.0246575	1	4.73522	2.95346	10.3034	2.32073	1.59167	3.45413	high
TCGA-DD-AADY	1.52055	0	4.23726	1.35866	0.318341	0.983	1.30354	0.664912	low
TCGA-DD-A4NN	2.46301	1	4.44792	3.07897	2.13379	0.958987	1.04263	0.937579	high
TCGA-DD-AA3A	1.12329	1	5.07202	3.64427	10.9804	1.53197	0.181553	2.07052	high
TCGA-LG-A6GG	1.06027	0	4.36467	1.54973	6.85394	0.330263	1.0777	0.950252	high
TCGA-G3-AAV4	0.0739726	1	4.57759	1.47417	1.77159	1.06672	1.36601	0.882527	low
TCGA-G3-AAV3	1.12877	0	4.50748	2.17809	8.99026	0.549755	0.697131	1.17027	high
TCGA-DD-AADL	1.74247	0	4.64586	2.13839	3.53424	0.563297	0.740315	0.785489	low
TCGA-FV-A3R3	1.00274	1	5.16869	0.395738	8.15085	1.37217	0.470551	1.15165	high
TCGA-DD-A1EA	6.61644	0	4.23417	1.58906	6.56487	0.368304	1.22313	0.96105	high
TCGA-DD-A1EL	1.13699	1	5.0134	3.36324	11.2102	2.27444	1.49153	4.0657	high
TCGA-DD-A3A5	8.56164	1	4.42102	2.12962	0.770287	0.819734	0.5363	0.572041	low
TCGA-DD-A11B	0.0383562	1	3.47607	1.33079	2.25599	0.659735	0.413024	0.40096	low
TCGA-DD-AAE0	1.52055	0	5.27843	3.63509	6.11068	1.10734	1.23071	2.01697	high
TCGA-DD-AADA	3.37808	0	3.71007	0.471911	0.470159	0.246461	0.531923	0.310937	low
TCGA-DD-AAW0	5.52055	0	3.4539	1.14189	4.97415	3.3202	0.328362	0.90374	low
TCGA-DD-AAC9	0.950685	0	3.86157	0.783566	7.44839	0.82467	0.475833	0.684473	low
TCGA-FV-A496	0.0273973	0	3.85649	0.97366	2.04545	0.696299	0.480655	0.434494	low
TCGA-CC-A3MA	0.830137	1	4.53029	3.39304	12.0574	1.81037	1.56605	3.49588	high
TCGA-DD-AACS	4.94247	0	4.82586	2.16531	1.54995	0.325306	0.737724	0.663906	low
TCGA-CC-A8HT	0.383562	1	5.11685	3.89234	8.85112	4.20347	2.28144	8.20152	high
TCGA-CC-5259	0.684932	0	4.2165	2.38967	4.32906	0.547304	0.393447	0.663466	low
TCGA-GJ-A3OU	2.40822	0	4.20392	2.36618	7.85134	1.3237	0.626534	1.17492	high
TCGA-DD-A4NF	1.1726	0	4.36285	0.0748372	7.83418	0.464554	0.362171	0.648007	low
TCGA-CC-A8HS	0.821918	1	4.64678	3.56966	1.8023	0.623204	1.31041	1.06313	high
TCGA-CC-A1HT	0.276712	1	5.21451	4.21372	8.74956	2.67341	0.752888	3.23962	high
TCGA-DD-AACT	4.27945	0	3.93385	1.29224	4.18046	0.330936	0.489007	0.50939	low
TCGA-PD-A5DF	1.75068	1	4.24782	2.69011	6.7555	1.44104	0.391235	1.06395	high
TCGA-DD-A4NQ	1.02192	1	4.96563	3.22385	9.72807	1.2134	1.04327	2.23324	high
TCGA-ZS-A9CD	3.79726	1	4.12037	0.733437	10.3454	1.81024	0.54069	1.22088	high
TCGA-DD-A73G	9.52877	0	4.91917	3.0122	2.57832	0.608877	0.642024	0.863759	low
TCGA-BC-A10Z	0.0931507	1	4.97105	2.49145	5.1478	0.499854	1.36666	1.31783	high
TCGA-FV-A2QQ	1.99726	0	3.92776	1.24562	10.0047	0.882925	0.975196	1.14413	high
TCGA-5C-A9VH	0.882192	0	4.41923	1.62058	3.07146	1.07115	0.491928	0.673581	low
TCGA-DD-AAVP	7.53973	0	4.55875	1.27532	2.60331	1.28311	0.412739	0.655932	low
TCGA-ZP-A9CV	2.98082	1	4.86809	1.09295	6.8301	0.988114	0.960529	1.15583	high
TCGA-ED-A82E	1.11781	0	4.2113	0.714242	9.86481	0.962436	0.324283	0.893795	low
TCGA-DD-AACU	4.29315	0	4.92343	1.3763	3.58344	0.471705	0.466931	0.67293	low
TCGA-ZS-A9CE	3.4	0	4.03584	1.0407	0.732481	0.759938	0.78103	0.475359	low
TCGA-DD-AACC	4.61644	1	4.25879	2.45825	4.16992	0.747293	0.747611	0.811354	low
TCGA-2Y-A9HB	0.712329	0	4.58515	1.13286	4.57422	0.646061	1.09707	0.861217	low
TCGA-ZP-A9CZ	1.93425	0	4.16047	3.76872	5.09132	0.499948	0.494943	0.869509	low
TCGA-RC-A7SB	1.61096	0	3.80367	1.89289	3.90676	1.11015	0.364455	0.600454	low
TCGA-BC-A112	0.419178	1	4.41707	2.68523	10.9616	1.38592	0.676675	1.7566	high
TCGA-BC-A10R	0.843836	1	4.79863	0.574518	10.192	1.54963	0.444705	1.298	high
TCGA-CC-A8HU	0.942466	1	5.42028	3.65361	6.61771	0.418049	1.64938	2.19937	high
TCGA-UB-A7MF	0.586301	1	5.34439	2.63598	5.22935	0.726839	0.702667	1.22128	high
TCGA-MR-A8JO	0.90411	0	5.02055	1.01176	9.75477	2.47883	0.628886	1.92297	high
TCGA-CC-A9FW	0.679452	0	4.35807	2.19256	7.95509	0.568122	1.11424	1.22435	high
TCGA-5R-AA1C	0.99726	0	4.44796	1.31503	11.268	1.82287	0.973738	1.88283	high
TCGA-XR-A8TF	1.89863	1	4.20724	1.29243	1.90569	0.502757	0.558799	0.490037	low
TCGA-2Y-A9H2	4.74247	0	4.27612	3.18951	10.9546	1.3838	1.97078	3.05072	high
TCGA-DD-AAE9	1.97808	0	4.23591	1.34395	5.89323	1.5734	0.635344	0.931074	high
TCGA-ED-A7XP	1.09589	0	4.10087	1.71242	5.73111	2.43535	0.520514	1.09694	high
TCGA-2Y-A9GX	6.69041	0	4.10449	1.18856	9.746	0.754119	0.790472	1.0519	high
TCGA-DD-AAD5	3.68493	0	5.00011	3.23605	10.8902	2.54404	0.671115	2.96961	high
TCGA-CC-A3MC	0.994521	0	4.14117	2.87633	10.1184	2.03755	0.658269	1.80687	high
TCGA-CC-5264	0.279452	1	5.40382	3.83724	7.08799	0.508205	0.647653	1.59235	high
TCGA-DD-AACY	3.9726	0	4.76787	0.467356	3.36123	0.656041	0.778733	0.659191	low
TCGA-BD-A3ER	3.05479	0	3.72649	0.84164	10.6698	1.86251	0.693385	1.22229	high
TCGA-CC-5263	0.353425	1	5.20125	4.40092	7.99303	1.25051	1.21747	2.64662	high
TCGA-5C-A9VG	0.89863	0	5.93744	3.16204	2.74539	1.29388	1.22135	1.80456	high
TCGA-2Y-A9H1	3.36712	1	4.04074	0.612316	8.32504	0.160974	0.461955	0.640066	low
TCGA-DD-AACL	0.293151	1	5.71992	3.72779	6.55555	3.12805	1.62576	4.65349	high
TCGA-G3-A25X	4.87397	0	4.62406	4.14558	10.0179	1.22884	0.461216	1.86865	high
TCGA-DD-AACA	6.30411	0	3.95643	2.86072	6.77771	0.448197	1.0074	1.00766	high
TCGA-BW-A5NO	0.0547945	0	4.69052	2.01838	4.97631	0.490119	0.768148	0.876529	low
TCGA-DD-AAE7	1.76438	0	3.49214	0.678072	5.03607	0.501352	0.440335	0.450575	low
TCGA-DD-AADF	0.315068	1	4.03934	2.97404	1.16487	0.489986	0.992636	0.66008	low
TCGA-DD-A1EF	1.07945	1	4.93442	2.09287	5.95262	0.642053	1.8915	1.6879	high
TCGA-G3-A3CK	1.60274	0	4.08509	1.1505	10.4638	0.784879	0.765251	1.10153	high
TCGA-DD-AADQ	1.19452	0	4.10157	0.758251	1.88987	0.216832	0.472407	0.39615	low
TCGA-G3-A5SK	2.03836	0	3.50215	0.187862	1.14585	0.29604	0.457264	0.292021	low
TCGA-DD-A3A6	8.92603	1	4.12839	0.906118	1.11136	2.16622	0.419481	0.603701	low
TCGA-ZP-A9CY	2.14247	0	3.9216	0.643319	5.39858	0.386806	0.488623	0.519773	low
TCGA-BC-A10Y	1.94795	1	4.71424	3.56448	2.93839	0.948567	0.81595	1.05637	high
TCGA-DD-AAVX	4.70685	0	4.06051	0.517712	8.94508	0.318559	0.598884	0.734975	low
TCGA-KR-A7K2	1.8	0	4.9213	1.45638	1.695	0.707603	0.798626	0.704224	low
TCGA-DD-A113	6.64384	0	4.61941	2.04245	6.29085	1.27322	0.479548	1.03649	high
TCGA-ED-A4XI	1.05753	0	4.53829	0.510597	6.27256	0.345305	0.638521	0.691692	low
TCGA-G3-A3CG	1.84384	0	4.50976	0.857849	5.12483	0.999391	1.03113	0.901005	low
TCGA-DD-A114	3.14795	1	5.26347	2.69658	6.57669	1.05421	0.702853	1.45849	high
TCGA-CC-A5UC	0.950685	1	4.47539	3.83266	5.48197	0.663426	2.66624	2.49141	high
TCGA-LG-A9QC	1.16438	0	4.22686	1.40116	2.30645	0.440808	1.0284	0.616278	low
TCGA-BC-A10S	3.89863	1	4.20398	0.336421	3.16057	1.28228	0.364582	0.531932	low
TCGA-CC-A8HV	0.764384	1	5.51929	2.98921	2.34375	0.805748	1.21631	1.33343	high
TCGA-FV-A3R2	0.531507	1	4.67765	2.27871	1.6658	0.562551	0.498233	0.627406	low
TCGA-DD-AACV	4.19452	0	4.45528	3.66503	2.68782	0.539572	0.675468	0.830873	low
TCGA-BC-A10T	2.29315	1	3.51862	2.08241	3.85439	1.99399	0.618422	0.777528	low
TCGA-G3-AAV2	1.01918	0	4.43593	0.322251	1.66386	0.507091	0.561005	0.448992	low
TCGA-DD-AAC8	0.0438356	1	4.51882	0.871979	9.15967	0.560455	0.621164	0.96354	high
TCGA-DD-AACZ	0.468493	1	5.75797	2.56706	8.93351	1.22783	2.65045	4.6247	high
TCGA-BC-A10U	2.29315	1	4.5366	1.97791	6.44034	3.84225	0.516422	1.93655	high
TCGA-HP-A5N0	2.06027	1	4.10434	0.192061	0.478058	0.777097	0.333943	0.353173	low
TCGA-CC-A7IL	0.761644	1	3.42837	2.07423	6.42392	0.206681	0.622686	0.604975	low
TCGA-BC-A69I	1.06027	0	4.04497	0.591356	3.56554	1.27458	0.364239	0.543143	low
TCGA-DD-A3A8	0.030137	1	4.11196	0.796574	3.00891	0.562798	0.676398	0.518522	low
TCGA-GJ-A6C0	0.0849315	1	4.29445	3.56325	8.06074	3.35669	0.792762	2.56072	high
TCGA-BD-A2L6	3.73425	0	4.27627	3.20799	1.09797	0.615225	0.696351	0.665265	low
TCGA-G3-A3CH	2.13699	0	3.99539	1.79687	2.16663	0.697775	0.663555	0.552931	low
TCGA-DD-AACN	3.56712	0	4.29751	0.957111	3.20876	1.12693	1.03847	0.757325	low
TCGA-G3-AAV1	0.983562	1	3.78139	1.68563	8.75985	1.03075	0.830381	1.02793	high
TCGA-DD-A11D	4.27397	1	3.7635	0.684731	3.63675	0.609328	0.649752	0.485825	low
TCGA-BC-A3KG	1.36438	0	5.57767	2.86229	4.52649	0.680927	1.33025	1.6231	high
TCGA-DD-AACF	1	1	4.47524	2.45442	3.19073	0.361435	0.511351	0.65839	low
TCGA-ED-A7PY	1.06849	0	4.84914	1.58305	0.369964	0.199038	1.1029	0.627346	low
TCGA-WQ-A9G7	0.0821918	0	4.50919	3.40823	4.81938	3.68068	0.778622	2.19326	high
TCGA-DD-AACQ	1.18356	1	4.51791	2.30722	3.234	0.0942958	1.19106	0.808035	low
TCGA-DD-AAE6	0.386301	0	5.19398	3.50549	0.90328	0.23392	0.849126	0.865697	low
TCGA-UB-A7MC	1.36986	0	3.89269	2.67252	3.57496	1.15298	1.34155	1.00395	high
TCGA-DD-A4NS	6.72877	1	4.73252	0.696337	8.37504	0.810679	1.01582	1.16965	high
TCGA-EP-A3JL	0.830137	0	4.31696	1.94074	8.67163	1.35824	0.727708	1.28701	high
TCGA-DD-A39Z	1.64658	1	4.64423	2.34028	1.45653	0.214306	0.490968	0.563696	low
TCGA-FV-A4ZQ	0.0328767	0	5.09745	3.45859	3.47919	0.39139	1.00004	1.14473	high
TCGA-CC-5258	0.353425	1	5.25407	3.04964	4.3846	1.21302	1.69014	1.97413	high
TCGA-DD-A39V	1.76164	1	4.24184	2.02587	10.4961	0.423863	0.58369	1.1123	high
TCGA-RC-A6M3	0.00273973	0	5.80482	2.81221	7.38443	2.636	1.11456	3.23856	high
TCGA-RC-A6M4	0.060274	0	4.0198	1.90787	2.53743	0.477431	1.06094	0.649079	low
TCGA-RC-A7SH	1.28219	0	4.2906	3.00887	2.67234	0.918208	2.27835	1.51328	high
TCGA-WX-AA44	1.68493	0	4.74621	3.05629	8.37932	3.21642	1.28858	3.30147	high
TCGA-DD-AAD6	1.8411	0	3.50604	2.81496	7.66021	0.528364	1.49239	1.17155	high
TCGA-ZP-A9D0	1.96438	0	4.44213	0.747331	1.82659	0.645783	0.50948	0.490488	low
TCGA-QA-A7B7	0.257534	0	4.81163	3.6174	1.22126	0.390382	1.20181	0.967366	high
TCGA-EP-A2KB	0.915068	0	4.49204	2.5613	0.803442	0.427765	0.851698	0.642179	low
TCGA-RC-A7SK	1.29315	0	4.03744	1.49101	4.22137	0.165936	0.378229	0.497531	low
TCGA-MI-A75C	0.79726	0	4.73235	1.73359	10.5738	0.365344	0.694199	1.27917	high
TCGA-CC-5262	0.282192	1	4.61742	3.05389	10.5571	2.33726	0.692385	2.41199	high
TCGA-DD-A73B	0.775342	1	3.60665	2.72471	3.46686	1.18649	0.982274	0.803418	low
TCGA-UB-A7MA	1.46575	0	4.76935	3.23116	10.0749	0.766331	1.20289	2.07606	high
TCGA-G3-A5SJ	1.91233	0	5.74294	2.39593	11.3592	0.891781	0.841753	2.43681	high
TCGA-DD-AADV	1.5726	0	4.67239	2.40233	5.51647	0.388464	0.437742	0.821394	low
TCGA-G3-A3CJ	1.6274	0	4.05523	0.825242	4.04044	0.467927	0.467391	0.500909	low
TCGA-DD-AAD8	3.33973	0	4.70061	2.11934	5.67113	0.885408	0.960812	1.1256	high
TCGA-2Y-A9H4	3.97808	0	4.566	2.17982	1.06751	0.437485	0.541101	0.562091	low
TCGA-DD-A4NL	4.68767	0	3.8393	0.240837	1.24535	0.80452	0.426844	0.366578	low
TCGA-2Y-A9H3	4.15342	0	4.64675	1.26504	1.02104	0.536327	0.561678	0.520841	low
TCGA-2Y-A9GW	3.48219	1	4.31753	1.23309	10.462	0.816054	0.528793	1.09248	high
TCGA-FV-A495	0.00273973	0	4.4137	3.74574	5.50773	0.259036	0.886525	1.06744	high
TCGA-DD-A4NA	2.76164	0	4.29949	1.81704	8.22621	1.91686	0.21499	1.13029	high
TCGA-CC-5261	0.265753	1	4.70206	2.40026	4.80622	1.29359	0.985734	1.21721	high
TCGA-XR-A8TC	3.66849	0	4.12567	1.73296	1.42546	1.30783	1.43068	0.848097	low
TCGA-DD-AADR	5.55616	0	3.50063	2.32094	9.03337	0.271979	0.543366	0.782477	low
TCGA-ED-A459	1.11781	0	4.94249	2.77794	6.86638	2.13211	0.356677	1.55804	high
TCGA-DD-AADN	2.46027	0	4.81182	3.55421	7.03546	0.262211	1.76864	1.8969	high
TCGA-G3-A25T	4.25479	0	4.90683	3.30501	8.58625	0.90591	0.171146	1.31533	high
TCGA-BC-A3KF	0.0219178	0	4.4309	2.02856	1.55494	2.21282	0.756747	0.92953	high
TCGA-DD-AACG	1.28493	1	5.11153	3.6947	6.69244	0.197163	1.03205	1.49998	high
TCGA-GJ-A9DB	0.183562	1	4.22788	2.09482	6.37555	1.15573	0.506449	0.920599	low
TCGA-2Y-A9GU	5.31233	0	4.97442	2.10387	1.3045	0.92704	0.54248	0.721634	low
TCGA-DD-A1EE	0.956164	1	4.74688	1.45758	8.77879	5.75613	1.0635	4.64507	high
TCGA-DD-A116	4.44384	1	3.52641	2.5132	6.76649	1.41239	0.42838	0.847129	low
TCGA-DD-AAVZ	5.20548	0	4.60949	1.84669	1.42128	0.483527	0.668696	0.595848	low
TCGA-EP-A2KA	0.978082	0	5.45204	2.90391	6.502	0.58475	0.410316	1.24864	high
TCGA-DD-AAVV	6.72603	0	4.4301	2.02042	5.77452	1.11097	0.674962	0.973669	high
TCGA-G3-A25S	1.13973	1	4.7019	3.82197	6.90843	0.336859	0.587674	1.1919	high
TCGA-DD-A4NI	1.53699	0	3.73236	0.584318	3.02711	0.365256	0.634971	0.422356	low
TCGA-DD-AAED	2.09041	0	5.66253	0.888346	4.10185	0.160358	0.299202	0.70554	low
TCGA-G3-AAV7	0.989041	0	5.56704	4.14408	9.35077	2.54223	0.681352	3.51885	high
TCGA-DD-A1ED	6.30411	0	3.92458	0.00948171	1.79139	1.0577	0.478094	0.4137	low
TCGA-DD-A4NO	6.15068	0	4.21285	0.808354	8.19339	0.784735	0.603884	0.845043	low
TCGA-EP-A12J	0.90411	0	4.3006	0.911967	1.64429	0.549364	0.980676	0.560454	low
TCGA-DD-AADD	3.3726	0	5.37955	3.31594	5.55901	0.540845	2.37677	2.62468	high
TCGA-DD-AAEE	2.21918	0	4.13329	2.14162	9.37008	0.37087	0.760928	1.05728	high
TCGA-2Y-A9GT	4.44932	1	4.01486	0.821494	1.07913	0.795796	0.895443	0.498225	low
TCGA-2Y-A9GS	1.98356	1	5.08572	3.10121	8.87685	2.51327	1.06238	2.93768	high
TCGA-DD-A3A4	1.67671	1	5.22641	0.839245	1.61794	0.895117	0.416966	0.629642	low
TCGA-DD-A73C	1.92055	0	4.25885	0.512591	0.403428	0.459608	0.489506	0.378479	low
TCGA-DD-A3A3	1.46575	1	4.05722	2.60046	10.4991	0.575673	0.440524	1.11923	high
TCGA-CC-5260	0.238356	1	5.36568	2.90399	11.7638	1.02312	0.545157	2.21957	high
TCGA-DD-AAVR	6.88493	0	4.46085	1.19601	7.11944	1.68636	0.477419	1.04067	high
TCGA-G3-AAV5	0.969863	0	4.40269	2.28096	9.80213	0.504977	0.807115	1.27387	high
TCGA-5R-AAAM	0.126027	1	4.0708	0.683277	5.94316	1.39476	0.620791	0.772238	low
TCGA-G3-A6UC	1.83836	0	3.58143	0.747844	1.68209	0.29825	0.423605	0.33378	low
TCGA-G3-A25U	4.48219	0	4.3769	2.91343	0.562563	0.392971	1.29439	0.758289	low
TCGA-DD-AACK	0.0246575	0	4.39424	1.49365	9.78302	0.814903	0.837894	1.24089	high
TCGA-BW-A5NQ	0.00273973	0	5.17288	4.01579	7.5967	0.642859	2.10959	2.97255	high
TCGA-EP-A2KC	0.0520548	1	4.09508	1.97702	8.2949	0.452205	1.09215	1.08952	high
TCGA-HP-A5MZ	0.249315	1	4.36797	1.08135	10.3248	1.07469	0.646639	1.19925	high
TCGA-DD-A4NB	1.07123	0	4.65237	0.611626	9.07389	1.79387	0.519252	1.24619	high
TCGA-DD-AACH	0.534247	1	5.4977	3.57032	8.16395	3.79221	1.06852	4.5809	high
TCGA-ZP-A9D2	2.03562	0	4.92951	2.59542	9.9023	4.28879	0.452305	3.43963	high
TCGA-KR-A7K7	1.11507	0	4.72921	3.62802	7.39737	0.620841	1.58276	1.95304	high
TCGA-2Y-A9GY	2.07397	1	6.10593	3.90164	8.25705	2.25287	1.83284	5.39786	high
TCGA-DD-AADJ	2.92055	0	3.87715	1.69545	5.2186	0.719945	0.725156	0.699852	low
TCGA-MI-A75I	1.72603	0	4.20504	2.77972	6.76971	2.32062	0.501661	1.3826	high
TCGA-DD-A73A	1.99452	0	4.01947	1.82031	6.83974	0.567395	0.592883	0.776119	low
TCGA-UB-A7MB	1.64658	0	4.36348	3.2954	4.50588	0.349192	0.773262	0.886944	low
TCGA-ZP-A9D1	0.0575342	0	3.98282	0.448088	9.76907	0.923598	0.823142	0.968002	high
TCGA-UB-AA0U	0.89589	0	4.06727	2.4362	4.23305	0.749171	0.554487	0.711182	low
TCGA-DD-AACX	0.465753	0	4.75904	2.7099	8.29871	0.266988	1.15002	1.43633	high
TCGA-ES-A2HS	1.88493	1	3.26281	2.06847	3.92283	0.530268	0.555548	0.492602	low
TCGA-DD-A1EJ	2.75342	1	4.43059	2.78698	6.90193	0.623441	1.73938	1.62595	high
TCGA-T1-A6J8	0.0630137	0	4.20448	0.171763	7.53658	0.835243	0.384357	0.676043	low
TCGA-DD-A118	9.41644	0	4.31401	1.65477	3.46213	1.58257	0.734553	0.847973	low
TCGA-ES-A2HT	1.2	1	4.16683	0.500924	8.16519	0.582514	0.375674	0.691091	low
TCGA-G3-A25Y	1.23836	1	5.11977	2.38928	6.5923	1.67723	1.28044	1.97388	high
TCGA-RC-A7SF	1.5863	0	4.22206	1.77948	3.38886	0.4797	0.884701	0.676611	low
TCGA-ED-A627	1.1589	0	4.52144	0.729478	5.01668	1.182	0.470914	0.733685	low
TCGA-BD-A3EP	1.12055	0	4.95158	1.37763	7.06666	1.15692	0.780258	1.21851	high
TCGA-DD-AADG	3.13699	0	3.96494	1.29981	2.95181	0.377406	0.684505	0.508549	low
TCGA-DD-A1EG	3.7589	1	4.5232	1.82167	10.2339	3.1645	0.728351	2.38761	high
TCGA-CC-A123	0.6	0	4.86812	4.00968	5.36412	0.328319	0.846119	1.25181	high
TCGA-DD-AAEK	2.92329	0	3.73159	2.02109	3.01286	0.714494	0.376973	0.506711	low
TCGA-BC-4072	4.08219	1	5.3445	2.88906	9.52028	1.97613	1.19242	2.99835	high
TCGA-WX-AA46	2.07123	0	3.85656	0.136735	1.21326	0.068653	0.352043	0.293222	low
TCGA-BC-A10W	0.249315	1	3.92797	3.51826	11.6295	1.50164	0.818889	1.9709	high
TCGA-DD-A39X	4.6411	1	4.62456	1.69648	11.0539	2.10256	0.521706	1.83364	high
TCGA-EP-A3RK	0.994521	0	3.96193	2.92655	11.4317	0.913164	0.604	1.4294	high
TCGA-RC-A6M6	0.0246575	0	4.49419	4.2343	4.76134	3.29551	1.6692	3.18368	high
TCGA-CC-A7II	1.09315	0	5.88468	4.04004	6.39287	0.802844	1.5203	2.72513	high
TCGA-DD-AAD3	3.54795	0	4.20679	0.826126	2.62472	0.803034	0.394155	0.490692	low
TCGA-DD-AACE	5.98356	0	3.97455	1.1877	2.25911	0.168607	0.74923	0.462108	low
TCGA-K7-AAU7	0.983562	0	5.3908	2.89779	9.7193	1.09638	0.837837	2.15955	high
TCGA-G3-AAV0	1.30411	0	3.88504	0.608647	0.543892	0.0977735	0.427764	0.310349	low
TCGA-2Y-A9H8	1.73425	1	4.89041	2.43909	5.63569	0.266971	0.676931	0.950583	high
TCGA-DD-AAW3	4.47397	0	4.77556	0.664848	0.440444	0.754022	0.817453	0.554158	low
TCGA-DD-AAE3	1.55068	0	3.29956	0.215995	1.31985	0.850904	0.316771	0.303455	low
TCGA-DD-AACD	1.04384	1	3.9577	1.50218	4.78036	0.942276	0.369956	0.615075	low
TCGA-DD-AAE4	1.66575	0	3.95837	2.53285	0.463084	1.05305	0.319807	0.499775	low
TCGA-DD-A1EK	1.52877	1	3.80932	1.64729	8.38815	2.79518	0.432624	1.31248	high
TCGA-K7-A6G5	1.40274	0	4.3791	1.52299	7.07315	0.692021	0.530637	0.848106	low
TCGA-DD-AAEG	1.96986	0	4.46359	1.45924	5.57759	1.7901	0.693223	1.064	high
TCGA-G3-A7M6	1.73151	0	5.60884	2.83985	10.0838	1.08948	1.29302	2.82534	high
TCGA-CC-A9FV	0.00273973	0	4.1271	0.642881	1.82961	0.204758	0.292005	0.362161	low
TCGA-DD-AADK	2.87397	0	3.49426	1.68584	7.1378	2.68189	0.462686	1.06711	high
TCGA-5R-AA1D	0.923288	0	4.82081	0.279145	10.0048	2.0346	0.211994	1.26514	high
TCGA-BC-A217	1.15342	0	5.02397	3.73017	6.48271	0.247976	0.924554	1.39968	high
TCGA-ED-A8O6	0.153425	1	4.92321	2.79806	8.22449	2.64876	2.14545	4.07293	high
TCGA-WQ-AB4B	1.08219	0	4.08108	1.30236	3.12158	0.434905	0.446501	0.491772	low
TCGA-DD-A1EH	4.09589	0	4.10962	1.91551	5.08575	0.840233	0.714513	0.783903	low
TCGA-DD-AAVQ	7.47397	0	4.46633	2.97368	1.85554	0.419185	0.784589	0.716026	low
TCGA-2Y-A9H6	0.978082	0	4.13513	1.19311	5.49638	1.21116	0.536785	0.752643	low
TCGA-ED-A66X	1.11233	0	4.55361	2.48972	7.32912	1.85164	0.948284	1.64487	high
TCGA-BC-A5W4	1.49863	1	4.41115	1.40053	4.2442	0.0724545	0.33663	0.527853	low
TCGA-G3-A7M8	1.17808	0	3.70029	0.400331	3.44928	0.840058	0.671783	0.481667	low
TCGA-KR-A7K0	0.178082	1	4.20523	1.18285	10.3446	2.0261	1.13688	1.78941	high
TCGA-FV-A23B	5.07397	1	4.46361	2.56067	5.08947	0.914773	1.07606	1.12318	high
TCGA-DD-AACJ	5.7589	0	3.66067	1.09109	9.37853	0.340545	0.929362	0.844085	low
TCGA-DD-A4NP	8.50411	0	3.81194	0.273725	1.23538	0.148089	0.466116	0.31564	low
TCGA-RG-A7D4	3.00822	0	4.67007	3.46934	5.82506	0.306353	2.09319	1.87377	high
TCGA-DD-AAEH	2.14795	0	4.29326	1.66029	1.89359	0.72171	0.887681	0.637357	low
