# Supplementary material for: Identification, Verification and Pathway Enrichment Analysis of Prognosis-Related Immune Genes in Patients With Hepatocellular Carcinoma
Source: Front Oncol. 2021 Sep 20;11:695001. doi: 10.3389/fonc.2021.695001 (PMC8488301; doi:10.3389/fonc.2021.695001)
Supplement: Supplementary Data Sheet 3 — — Risk value file for patients in the ICGC liver cancer cohort. [file DataSheet_3.xlsx]

## Sheet: Sheet1
id	futime	fustat	HDAC1	BIRC5	SPP1	STC2	NR6A1	riskScore	risk
DO45257	2.21918	0	3.79944	2.59063	9.96037	1.59574	0.915788	1.54267	high
DO45131	0.986301	1	4.46786	3.79913	4.44019	0.756381	1.23795	1.30227	high
DO50855	1.56164	0	3.76101	1.76733	6.53311	1.02118	0.180805	0.658616	low
DO45115	2.30137	0	4.38654	2.97958	7.42092	0.460165	0.621366	1.05237	high
DO45229	2.71233	0	4.29049	2.15927	5.95086	0.370378	0.395939	0.720154	low
DO48725	2.13699	0	4.32875	2.37675	4.19033	0.928036	0.433407	0.755042	low
DO45225	2.87671	0	4.92953	4.28533	6.83421	1.14641	1.25152	2.15731	high
DO50859	0.493151	0	4.1728	1.53363	8.36134	0.3807	1.56679	1.25382	high
DO45119	1.39726	1	4.16039	3.2487	10.4126	0.745765	0.526643	1.35465	high
DO23518	3.61644	0	4.66997	2.51392	2.66984	2.21311	1.1901	1.39613	high
DO48757	1.31507	0	4.82358	3.60433	8.97453	0.554553	2.51117	3.26906	high
DO50816	1.06849	0	4.0298	2.28464	2.59687	0.856647	0.841059	0.692727	low
DO23541	2.54795	0	4.04822	1.81312	10.455	1.15867	0.691599	1.27172	high
DO48732	1.72603	0	4.72112	1.91342	9.18749	4.10897	0.742595	2.98005	high
DO45235	2.46575	0	4.87308	3.59413	5.6313	0.680302	1.19052	1.51537	high
DO50787	1.31507	0	4.30703	1.56026	6.15033	1.12318	1.35951	1.20166	high
DO45307	0.657534	1	5.14422	5.14646	9.64908	1.94926	0.107196	2.51386	high
DO45211	0.657534	0	7.3882	5.26648	7.18033	0.950803	0.71045	4.01883	high
DO45121	4.19178	0	4.70347	1.7892	2.69767	1.23024	0.866391	0.879422	low
DO48700	2.21918	0	3.84563	1.87349	10.7447	0.941669	0.571741	1.11816	high
DO48706	2.38356	0	5.02083	2.45721	1.60223	1.15204	0.781199	0.91737	low
DO45107	4.68493	0	4.23702	1.45141	1.18319	0.191758	0.626464	0.453219	low
DO45239	2.38356	0	4.00845	3.07661	6.71576	0.484025	0.956708	1.03708	high
DO45267	1.56164	1	5.14663	3.80456	10.1714	2.41739	1.36692	4.06314	high
DO45113	4.27397	0	3.58323	2.71018	7.86289	5.24995	1.01602	3.15916	high
DO48723	1.64384	0	4.45218	3.7282	11.5398	1.14327	0.845628	2.17562	high
DO45147	1.9726	1	4.69423	4.05676	6.60515	1.60073	0.283786	1.44569	high
DO45187	3.45205	0	4.03307	3.4109	5.40687	0.87778	1.81795	1.53233	high
DO48746	1.56164	0	3.58958	1.83349	0.804876	1.32949	1.16534	0.630129	low
DO45177	3.45205	0	4.35232	1.23683	8.33894	0.694955	0.48151	0.881115	low
DO23537	2.46575	1	4.68371	4.16406	6.47124	1.37318	1.0123	1.83727	high
DO45197	3.20548	0	4.47539	2.76707	5.71498	1.97675	1.74729	2.08176	high
DO45223	2.79452	0	4.57419	1.45604	7.32815	0.976659	0.437944	0.938761	high
DO23516	0.0547945	1	4.48273	3.76632	0.326727	1.05141	0.959728	0.887869	low
DO23527	2.87671	0	5.02083	1.58632	1.32536	0.912283	0.888728	0.780983	low
DO50818	1.39726	0	4.16105	2.16707	3.5055	0.929007	1.14066	0.877733	low
DO45233	2.46575	0	4.1673	1.0319	7.52586	0.785533	0.39665	0.74859	low
DO23552	2.21918	0	4.86998	3.88744	3.6078	0.873647	0.877047	1.23133	high
DO23510	2.38356	0	4.77869	2.05863	10.8543	1.65682	0.547823	1.79849	high
DO48733	1.64384	0	4.29945	1.08117	5.40798	1.17887	1.19569	0.999646	high
DO45097	4.43836	0	4.65128	1.71213	2.008	1.15521	0.636776	0.723649	low
DO48681	2.46575	0	5.11851	4.09103	1.94438	0.890058	2.61784	2.40965	high
DO45175	3.12329	0	4.2063	2.38572	12.3215	1.73545	1.93487	3.21409	high
DO23539	3.0411	0	3.86167	3.09214	7.35011	1.24749	0.802177	1.18929	high
DO23532	2.63014	0	4.59494	1.82546	2.46679	0.324642	0.706584	0.630256	low
DO45253	2.38356	0	4.55176	3.84734	10.0352	2.23677	1.59258	3.55661	high
DO45185	1.64384	0	5.31932	3.13718	8.6266	1.0303	0.337159	1.60438	high
DO45199	3.69863	0	4.31909	2.96359	7.76674	1.18471	0.622115	1.26628	high
DO45145	0.164384	1	5.65793	4.99624	12.0896	1.07115	1.74	5.4729	high
DO45149	3.45205	0	4.4118	1.87277	1.75328	2.23712	1.12052	1.07151	high
DO23548	2.30137	0	4.27583	1.82785	2.23469	1.55616	0.873849	0.815327	low
DO45195	1.06849	0	3.26138	1.97831	3.33538	1.06223	0.801107	0.582708	low
DO23535	2.63014	0	3.74615	1.79446	8.02694	1.29905	0.560067	0.930523	high
DO45179	1.64384	0	4.37489	2.93262	3.59683	0.587461	0.607342	0.777261	low
DO45189	3.28767	0	5.26372	2.60241	4.90385	0.713376	1.27255	1.45009	high
DO50840	0.90411	0	4.79148	4.46631	2.24518	0.794315	1.41048	1.41802	high
DO50808	1.56164	0	3.89341	2.0449	8.6266	1.42809	1.06094	1.33747	high
DO23511	0.493151	1	3.77809	4.12241	10.1434	3.30554	1.4117	3.59164	high
DO45092	3.28767	1	5.13483	3.32503	10.0872	4.59817	0.653215	4.81141	high
DO45099	4.35616	0	5.0805	1.59485	0.957679	1.13394	0.638666	0.736515	low
DO23525	2.87671	0	4.77773	5.72501	7.9309	0.533865	0.828907	2.00709	high
DO45303	2.71233	0	3.88684	1.08571	10.2611	2.91659	0.39364	1.47077	high
DO45241	2.9589	0	4.89284	2.46084	5.34228	1.21651	0.683313	1.1788	high
DO50783	1.31507	0	4.09068	2.09921	3.18914	0.746632	0.555847	0.626008	low
DO50774	1.9726	0	3.9107	1.6753	6.61675	2.41706	1.34816	1.54586	high
DO45281	2.05479	0	4.73548	1.08634	6.19826	0.507965	0.698213	0.842159	low
DO45263	0.739726	1	5.48827	3.14392	7.56218	0.803879	0.495959	1.55778	high
DO50793	1.47945	0	4.45553	2.10526	8.63407	0.935855	1.02166	1.38848	high
DO45103	1.23288	0	4.72696	1.96661	7.17615	1.9923	0.0811042	1.15716	high
DO48741	0.657534	0	5.58116	4.82393	5.15455	0.226697	0.790748	1.62215	high
DO23529	2.54795	0	4.93055	2.48661	7.77323	1.15554	1.16962	1.75681	high
DO45095	4.43836	0	4.68947	2.20955	9.06659	1.01647	0.203725	1.14627	high
DO45173	3.20548	0	5.15791	2.87136	2.72574	0.820111	1.22942	1.22836	high
DO48701	2.13699	0	4.1707	2.19756	1.89123	1.15934	0.489134	0.628268	low
DO48759	1.9726	0	3.67651	2.3292	5.06037	1.4784	0.364178	0.74112	low
DO45255	1.9726	0	3.77582	2.23084	4.32776	1.51589	0.668744	0.80827	low
DO45183	1.56164	1	4.45218	2.47669	5.78616	1.42626	0.276089	0.961778	high
DO50822	1.39726	0	4.82848	1.45282	11.5398	1.44791	0.793052	1.86148	high
DO50829	1.56164	0	4.35232	4.53312	11.1826	4.88612	0.167488	4.37778	high
DO45143	3.53425	0	4.17207	2.70065	9.07702	1.11224	0.914744	1.44146	high
DO48727	1.06849	1	3.41777	2.18911	7.55693	0.850998	1.21008	1.0008	high
DO48716	1.9726	0	4.32954	2.84654	6.59677	1.21478	0.667184	1.16281	high
DO45117	3.0411	1	3.25089	2.86907	8.3835	0.495657	1.52723	1.17035	high
DO50857	0.575342	0	3.98742	1.94295	1.27931	2.00329	1.84581	1.16275	high
DO45227	2.79452	0	3.49898	2.67051	3.3175	0.951446	1.85141	1.0236	high
DO45193	0.328767	1	5.96766	3.80259	3.01964	0.829789	2.34161	2.86157	high
DO50825	1.06849	0	3.66322	2.24035	9.51707	1.3929	0.937222	1.30492	high
DO45161	1.47945	1	4.80957	5.2126	5.28211	0.512511	1.17671	1.7311	high
DO23533	2.46575	0	3.86828	2.81981	7.93718	0.950203	1.11109	1.26852	high
DO45201	2.46575	0	3.72601	1.11333	5.36059	1.45219	0.423528	0.661339	low
DO45259	0.90411	0	5.99096	3.49655	8.66848	1.40793	0.845956	2.78067	high
DO23534	2.30137	0	4.39517	1.13475	0.332809	0.557939	2.1184	0.846416	low
DO50785	0.246575	1	5.16887	4.63443	4.27284	0.381572	0.924437	1.4257	high
DO50800	1.39726	0	4.99774	0.831557	4.61392	4.13343	0.441629	1.68916	high
DO45269	2.05479	0	5.59828	4.97983	8.79694	2.51168	1.10478	4.49307	high
DO45237	2.46575	0	5.11013	2.974	0.502075	0.645698	1.09197	0.925307	high
DO45109	4.35616	0	4.17918	1.7567	6.1715	1.1105	0.216504	0.748254	low
DO50811	1.23288	0	3.61455	2.33117	1.71452	0.466306	0.658469	0.483924	low
DO50799	1.47945	0	5.64521	3.01874	7.60499	0.822544	2.36099	3.43654	high
DO23546	2.87671	0	4.43115	1.98729	5.84132	0.439572	0.728495	0.844726	low
DO23508	1.06849	0	4.75431	4.20084	8.81524	2.79496	0.642001	2.79806	high
DO23540	2.05479	0	4.43429	3.04335	8.75821	0.991783	0.656241	1.39119	high
DO23524	2.87671	0	4.37416	3.53482	8.73969	1.10564	0.820619	1.6073	high
DO23523	2.9589	0	4.28167	0.782697	8.8449	1.15867	0.266828	0.867631	low
DO50806	1.47945	0	5.17248	4.52511	7.75518	0.716475	0.0696238	1.44325	high
DO45305	0.821918	0	3.766	2.89027	10.2313	1.10737	0.128351	1.05112	high
DO50839	0.90411	0	3.92733	1.50991	1.70205	0.741448	0.398938	0.454792	low
DO45094	4.52055	0	4.7582	1.00214	8.39833	0.378901	0.768862	1.00322	high
DO45093	1.9726	1	4.56644	6.15525	6.17763	2.3841	0.833399	2.73302	high
DO50832	0.246575	0	4.51327	3.67363	3.47794	1.11119	0.785294	1.08724	high
DO45265	2.79452	0	5.11379	2.89722	2.51129	0.611537	1.08041	1.06926	high
DO45105	4.60274	0	4.85647	3.6354	1.34144	0.787904	0.463715	0.811858	low
DO48737	1.9726	0	5.09949	2.99055	7.74358	0.864723	0.497552	1.4024	high
DO50789	1.56164	0	3.62377	2.83277	0.728418	1.67519	1.10592	0.773588	low
DO23547	2.79452	0	4.53191	0.937972	10.333	0.797257	0.30164	1.00264	high
DO45205	0.246575	1	5.84803	2.79435	12.821	1.05875	0.864626	3.15713	high
DO48751	1.31507	1	4.41253	3.31428	9.4137	0.995433	1.4	2.05093	high
DO45165	1.89041	0	5.32465	2.66945	10.4126	1.82424	0.719126	2.47658	high
DO23513	3.28767	0	4.34016	1.77051	6.4206	0.327118	0.707534	0.807504	low
DO50807	1.47945	0	4.40059	3.60433	2.00769	1.05706	1.39071	1.16178	high
DO23514	3.53425	0	4.9178	2.15078	4.31849	1.5777	0.681094	1.13968	high
DO48730	1.72603	0	5.43523	3.47427	7.18473	1.66005	1.41372	2.78525	high
DO45209	3.69863	0	5.80024	4.67451	3.06725	0.332428	0.777518	1.45327	high
DO45251	2.46575	0	4.18353	1.5289	11.3136	1.51589	0.304557	1.27485	high
DO45169	3.69863	0	4.49104	3.09717	11.1826	0.951133	0.376573	1.54225	high
DO45137	3.61644	0	3.59122	1.71284	7.70323	1.59114	0.657491	0.956191	high
DO48736	1.64384	0	4.59062	1.70231	3.64585	1.34755	0.216041	0.719522	low
DO50819	1.39726	0	3.81969	2.74692	5.54345	2.90809	0.517283	1.28998	high
DO45159	4.0274	0	4.98004	1.60023	6.38518	0.83689	0.935007	1.17882	high
DO50791	1.31507	1	4.71831	3.1192	10.2313	1.03131	0.907408	1.93152	high
DO45101	4.60274	0	4.04098	1.21175	1.97663	0.458084	0.539243	0.455464	low
DO45261	2.71233	0	3.75585	1.11685	5.68535	3.92932	0.453254	1.27555	high
DO48720	1.56164	0	4.39986	3.59055	8.94251	1.72486	0.581179	1.75432	high
DO50850	1.9726	0	4.1673	2.23526	7.02529	1.24958	1.03726	1.23513	high
DO48743	1.56164	0	4.29504	2.80745	7.54642	1.27408	0.638351	1.24262	high
DO45127	1.15068	1	5.67529	5.34722	8.56644	1.50716	3.03027	8.084	high
DO227643	3.45205	0	4.52861	1.27929	0.462645	0.17001	0.89945	0.50416	low
DO48717	0.493151	1	5.1007	3.55451	2.79427	3.10871	0.273723	1.59397	high
DO45217	0.739726	1	5.66723	4.47822	3.80906	0.927359	0.760711	1.66243	high
DO45301	3.94521	1	5.25096	4.13613	6.15668	1.98853	0.184607	1.75254	high
DO45243	2.54795	0	5.16887	1.25431	7.33653	0.807754	0.867103	1.24105	high
DO50815	0.410959	0	5.62802	4.01676	1.12425	1.24854	2.00252	2.20227	high
DO45155	5.91781	0	4.98318	4.15976	8.73969	1.89739	0.379237	2.13247	high
DO48761	2.38356	0	4.24847	2.05075	10.2313	1.73615	0.813391	1.65717	high
DO45283	1.39726	0	4.86998	2.53809	15.1042	2.22927	0.366851	3.01224	high
DO45273	1.31507	0	4.88346	2.36767	10.4126	1.19359	0.353397	1.54024	high
DO23515	3.36986	0	5.25096	3.75689	6.21773	1.35676	0.226723	1.45449	high
DO45191	3.28767	0	4.11451	2.00813	5.32088	0.492068	0.56119	0.699788	low
DO45203	3.20548	0	5.3312	1.42351	3.54443	1.28541	0.995795	1.15133	high
DO45163	2.63014	0	3.92293	3.64419	8.39833	1.03395	1.56065	1.84179	high
DO23531	2.46575	0	4.43826	0.454458	3.83151	0.452578	0.838968	0.605433	low
DO45181	3.28767	0	4.72202	0.810708	4.79799	0.346215	0.493569	0.635275	low
DO48704	2.05479	0	4.38111	3.22817	11.6168	0.986834	0.783329	1.87552	high
DO45171	1.64384	0	4.36244	1.30219	11.2463	0.669674	0.962666	1.37201	high
DO45141	3.61644	0	4.70168	1.15295	8.13386	1.65044	0.429513	1.17452	high
DO23550	2.71233	0	4.46625	2.51493	2.6644	0.738876	0.58723	0.717116	low
DO48728	0.410959	0	5.04841	2.71345	8.25745	1.48231	0.340905	1.51491	high
DO23519	1.72603	0	5.17603	4.95029	10.333	3.09389	0.224929	3.63049	high
DO23512	3.45205	0	4.71456	1.42882	3.88481	0.32214	0.285603	0.585624	low
DO48677	3.12329	0	4.60034	0.9236	0.0962645	1.34575	1.23752	0.727063	low
DO45091	3.61644	1	4.31308	2.01607	6.73685	0.89649	1.472	1.33414	high
DO45289	0.986301	0	5.14663	3.02007	13.8219	1.62596	0.123818	2.45562	high
DO45279	3.53425	0	4.45301	0.775868	15.1042	2.0573	0.680784	2.26391	high
DO45249	1.72603	0	4.61985	1.48665	15.1042	1.47405	0.0361778	1.75419	high
DO45299	3.94521	0	5.66085	4.64474	9.08655	0.819231	0.452227	2.26628	high
DO45245	0.657534	1	5.13369	4.49487	7.78457	0.792869	1.03806	2.14744	high
DO48742	1.64384	0	4.11112	1.16749	6.80169	1.06806	1.0327	0.979624	high
DO45285	1.31507	0	3.98365	3.11954	9.14104	2.61231	0.371754	1.68773	high
DO45153	3.78082	0	4.28311	3.38784	5.73347	0.908779	0.382805	0.952361	high
DO50813	1.15068	0	4.16799	2.12442	5.10974	1.21549	0.680119	0.889877	low
DO50814	1.15068	0	4.05289	2.92644	4.70467	1.66672	1.13122	1.24849	high
DO45275	0.0273973	1	5.18461	5.39376	10.8033	3.85187	0.559789	5.55738	high
DO48697	2.21918	1	4.709	3.27638	6.14628	1.10699	0.000170125	0.988953	high
DO23521	3.0411	0	4.69978	3.88427	6.31025	0.599482	1.57856	1.82079	high
DO50804	1.9726	0	5.39051	1.16148	4.32033	0.979911	1.37269	1.30156	high
DO23526	2.87671	0	5.07239	3.67658	9.63161	0.953423	0.231112	1.64545	high
DO50803	1.47945	0	3.91385	2.03288	3.21844	0.949205	0.991715	0.73999	low
DO23517	3.28767	0	3.8462	1.53606	3.76202	0.694679	1.38167	0.778533	low
DO23544	2.63014	0	3.76101	1.40075	4.96213	0.884366	0.541662	0.614054	low
DO23543	2.79452	0	4.58458	2.29611	1.96157	0.390598	0.787735	0.676023	low
DO45133	1.80822	1	4.36404	1.86824	5.33988	0.562292	1.36733	1.04251	high
DO227801	1.80822	0	4.10637	1.4102	4.40404	0.989758	0.670262	0.702248	low
DO45096	3.53425	1	4.50396	2.67412	1.6733	0.424709	0.74656	0.674129	low
DO45123	1.56164	1	4.40222	2.71843	10.5966	1.77733	1.50305	2.62155	high
DO48747	1.47945	0	4.27583	4.99562	9.03538	2.98161	0.110001	2.33759	high
DO45297	3.45205	1	7.32931	2.71904	10.6471	1.00615	0.0942695	2.911	high
DO23509	2.13699	1	3.89465	4.22223	7.74358	0.407749	2.10714	2.00664	high
DO23551	0.410959	1	4.07992	0.398754	6.3012	0.651226	0.614157	0.636792	low
DO50798	0.0821918	1	4.44889	3.04528	9.05584	2.6332	1.91044	3.56143	high
DO45277	1.64384	0	5.02669	2.15622	8.6266	0.458701	0.450273	1.16666	high
DO45287	1.06849	0	7.36647	2.87038	3.21321	0.754105	0	1.4642	high
DO50778	1.72603	0	5.57529	3.89453	12.821	2.24421	0.241387	3.53729	high
DO23536	2.54795	0	4.71731	1.4303	2.73677	0.858533	0.973083	0.802682	low
DO45247	0.575342	0	4.00531	2.57577	3.65544	0.992437	1.02887	0.87299	low
DO23530	0.493151	1	4.94965	1.28302	6.92906	2.76616	0.105237	1.34247	high
DO48672	1.23288	0	4.53024	1.64826	7.64211	2.49233	1.62627	2.29379	high
DO48682	0.328767	1	4.99214	3.60837	11.6168	4.67067	2.5905	12.1577	high
DO48679	3.28767	0	3.69357	2.99118	5.7768	0.924214	0.342192	0.75065	low
DO50845	0.575342	0	4.55088	1.0273	9.29631	1.27095	0.533191	1.15541	high
DO48695	1.9726	0	3.78219	2.07713	6.54889	0.969425	1.74729	1.28989	high
DO45213	3.28767	0	4.88967	2.69932	7.17615	1.04362	0.634004	1.33305	high
DO23538	1.23288	0	4.34618	1.64509	1.42526	0.438188	1.01307	0.6096	low
DO45139	3.61644	0	3.39261	2.12648	6.76467	1.82106	0.477419	0.869772	low
DO45167	3.94521	1	2.93012	2.40855	8.98494	1.5206	0.706584	0.968675	high
DO50776	1.89041	0	4.46376	2.19345	7.17215	1.26589	0.375703	1.04182	high
DO45207	2.87671	0	4.21782	2.52287	4.82208	0.560311	0.833053	0.844484	low
DO23545	1.56164	1	4.47109	2.81789	6.83421	1.59006	0.721392	1.38028	high
DO45221	1.06849	1	4.26379	3.2518	11.1249	0.847571	0.930195	1.78956	high
DO48760	1.89041	0	4.39678	1.78071	2.12233	0.183569	0.757723	0.566207	low
DO50805	1.89041	0	4.46869	2.17546	11.5398	2.35106	0.664682	2.19735	high
DO50802	2.54795	0	4.62078	2.05005	10.8543	1.71087	1.06209	2.13977	high
DO50809	1.9726	1	4.68371	4.18765	6.78006	1.11359	0.930195	1.71658	high
DO45111	4.35616	0	3.53688	1.78635	1.15652	1.27758	1.01155	0.58883	low
DO48721	2.46575	0	4.21273	1.38916	1.47083	1.01786	0.862065	0.615667	low
DO23542	2.63014	0	4.26302	1.94576	11.4595	1.36383	1.0445	1.82026	high
DO23549	2.71233	0	5.21332	2.76904	7.9883	0.727219	0.818813	1.57942	high
DO45135	3.86301	0	4.28529	2.00712	9.00406	2.03429	0.357658	1.34502	high
DO48715	1.89041	1	4.09612	3.79565	3.33124	1.18436	0.397311	0.841183	low
DO45219	2.9589	0	4.82358	3.12866	7.74935	0.752687	0.772509	1.43443	high
DO48674	3.45205	0	3.98803	0.603473	2.37043	0.158034	0.199581	0.344426	low
DO45125	4.60274	0	4.26228	1.97662	0	0.796953	0.582357	0.507717	low
DO50844	0.821918	0	6.22881	1.85559	0.766809	0.136479	1.01935	0.961994	high
DO45129	4.0274	0	3.78449	2.47069	9.89215	1.15094	1.3308	1.59234	high
DO23528	2.79452	0	4.58458	1.8545	0.312908	0.774901	1.55065	0.828673	low
DO48719	1.89041	0	4.65128	1.87733	1.48476	0.941669	0.817097	0.723752	low
DO48693	2.46575	0	4.78255	2.32381	4.46002	1.33539	0.595082	1.03337	high
DO45215	3.20548	0	4.36018	1.20374	2.69735	0.797257	0.854745	0.655217	low
DO48712	2.21918	0	4.88967	2.61856	3.2931	1.04362	0.252824	0.817411	low
DO50820	1.39726	0	4.13216	3.53699	4.66003	0.975365	1.35587	1.28202	high
DO45231	2.54795	0	5.13944	2.13397	11.0706	1.06773	0.523897	1.76323	high
DO45157	5.42466	0	4.9605	2.90424	9.4137	0.919102	0.835458	1.77611	high
DO50817	1.06849	0	3.97107	1.27897	0	1.05577	1.29414	0.600524	low
